# Supplementary material for: Integrative Genomic Analysis Identifies Isoleucine and CodY as Regulators of Listeria monocytogenes Virulence
Source: PLoS Genet. 2012 Sep 6;8(9):e1002887. doi: 10.1371/journal.pgen.1002887 (PMC3435247; doi:10.1371/journal.pgen.1002887)
Supplement: Table S6 — List of Primers used in this study. (XLSX) [file pgen.1002887.s010.xlsx]

## Sheet: Sheet2
Supplementary Table 6. List of Primers used in this study
Primer Name	Sequence	Comment
argD A XmaI	aaaacccgggttattctggtggccgatttg	For deletion generation
argD B	ttttgcatacattgTCATCCCTCTTCACTCCCAATTTCATccaatcgc	For deletion generation
argD C	gcgattggATGAAATTGGGAGTGAAGAGGGATGAcaatgtatgcaaaa	For deletion generation
argD D EcoRI	ttttgaattcgcatgaagcctatttcccg	For deletion generation
aroD A XmaI	aaaaggatccATCGGGTTAATCGCCACTCC	For deletion generation
aroD B	tgctacttttttagtatttaTTACATgtataattctcctcattcga	For deletion generation
aroD C	tcgaatgaggagaattatacATGTAAtaaatactaaaaaagtagca	For deletion generation
aroD D EcorI	aaaagggcccggaatcgtcattcgctggag	For deletion generation
aroE A XmaI	atatcccgggGTTGGAAAGTCTCTCGGCGTC	For deletion generation
aroE B	atacagcactggtagaagttgTTATTTTTTCATcgtcatttcgctcctattcgt	For deletion generation
aroE C	acgaataggagcgaaatgacgATGAAAAAATAAcaacttctaccagtgctgtat	For deletion generation
aroE D EcoRI	aaaagaattcCCAGTTTCCCAGCTTCAAGGA	For deletion generation
hisC A XmaI	aaaacccgggtttgccagaacgggaattgc	For deletion generation
hisC B	aacgcctccaaacacTTACAATTTCATtacgcatccccctctttc	For deletion generation
hisC C	gaaagagggggatgcgtaATGAAATTGTAAgtgtttggaggcgtt	For deletion generation
hisC D EcoRI	aaaatctagaGAATCGCACCGCCTTGATGA	For deletion generation
ilvC A XmaI	tcgcctagcaatccgaattaagtaTTAATGTGTCATttttcctaacct	For deletion generation
ilvC B	tcgcctagcaatccgaattaagtaTTAATGTGTCATttttcctaacct	For deletion generation
ilvC C	aggttaggaaaaATGACACATTAAtacttaattcggattgctaggcga	For deletion generation
ilvC D XbaI	aaaatctagacaacttcttcaagagccgtattc	For deletion generation
purH A XmaI	aaaacccgggctcgatgcagaaattggtga	For deletion generation
purH B	acacgtccttttggaggaTTAATGTTTCATgataattaatcgttccct	For deletion generation
purH C	agggaacgattaattatcATGAAACATTAAtcctccaaaaggacgtgt	For deletion generation
purH D XbaI	tttttctagaaagcgcacatctggtttttc	For deletion generation
rhaB A XmaI	aaaacccgggatgtgggccagcaattatct	For deletion generation
rhaB B	tcccattctaaaagcctcCTAATTTTTCACtggtctagctccttttct	For deletion generation
rhaB C	agaaaaggagctagaccaGTGAAAAATTAGgaggcttttagaatggga	For deletion generation
rhaB D XbaI	tttttctagacatcatccataatcaccacatg	For deletion generation
plcA/prfA promoter F	aaaaGGGCCCCATATATTATTCCTACAAAAAAGGGTTA	For pPlcA/pPrfA (P1P2) cloning
plcA/prfA promoter R	atatGTCGACccCATGTCTCATCCCCCAA	For pPlcA/pPrfA (P1P2) cloning
codY A EcoRI	aattggatcctttggcggcatgaatcaacc	For deletion generation
codY B	ccagagaaagcttttctagtttttttagttagtcattattagatcctcctagtattttat	For deletion generation
codY C	TAAAAAAACTAGAAAAGCTTTCTCTGG	For deletion generation
codY D XmaI	ttttcccggggctcgatttgttcaaaggct	For deletion generation
plcA promoter F ApaI	atatGGGCCCGGGTTTCACTCTCCTTCT	For pPlcA cloning (P3)
plcA promoter R SalI	ttttGTCGACccCATAATGGCCCCCTCCTTTGA	For pPlcA cloning (P3)
argD com A EagI	atatcggccgGATTAACCGTTTATCCTAGAAAA	For complmementation construction
argD com B	TTATTTTTGTTCCGTTAATTATTAAATGATACT	For complmementation construction
argD com C	TTTAATAATTAACGGAACAAAAATAAAAAACAA	For complmementation construction
argD com D XmaI	tatacccgggTCATCCCTCTTCACTCCCAATCA	For complmementation construction
aroE com A EagI	tttacggccgagcatagtatagagtttagggaa	For complmementation construction
aroE com B	GTCATTTCGCTCCtatttcagctagattttcta	For complmementation construction
aroE com C	tctagctgaaataGGAGCGAAATGACGATGAAA	For complmementation construction
aroE com D XmaI	tatacccgggTTATTTTAATAGTGAACGAATAT	For complmementation construction
hisC com A EagI	tttacccgggAGCATAGTATAGAGTTTAGGGAA	For complmementation construction
hisC com B	TTTCACTAAATCTtatttcagctagattttcta	For complmementation construction
hisC com C	tctagctgaaataAGATTTAGTGAAAGAGGGGG	For complmementation construction
hisC com D XmaI	tatacggccgTTACAATAATTTTTCTAAAAGTG	For complmementation construction
ilvC com A EagI	tatacggccgcaacaaaaacccggctttcctac	For complmementation construction
ilvC com B	TGTAGTAAATGATaattaagaattgtttgccga	For complmementation construction
ilvC com C	acaattcttaattATCATTTACTACAGAGCAAT	For complmementation construction
ilvC com D XmaI	tatacccgggTTAATGTTGTGGTTTGACAAATG	For complmementation construction
purH com A EagI	tatacggccgaagagaagcttacctatgatggt	For complmementation construction
purH com B	AATCGTTCCCTCCtaataatctcttttcgactc	For complmementation construction
purH com C	aaagagattattaGGAGGGAACGATTAATTATC	For complmementation construction
purH com D XmaI	tatacccgggTTAATGTTTGAAGTGTCGTACAT	For complmementation construction
rhaB com A EagI	tatacccgggtttcacaatctccttctgtaaat	For complmementation construction
rhaB com B	AGCTCCTTTTCTTactcattttagttaagcgct	For complmementation construction
rhaB com C	aactaaaatgagtAAGAAAAGGAGCTAGACCAG	For complmementation construction
rhaB com D XmaI	tatacggccgCTAATTAAATTCAAGTACCTTAG	For complmementation construction
Primers for RT-PCR
Primer Name	Sequence
argD F	TCTTTCCACGGACGAACATTC
argD R	GGAACAAGCTCACCGAAACC
aroE F	GTTCTGAATTTGCGCCGATT
aroE R	TGCACTAGCGACTGGCATATG
hisC F	GGCGGCTCTTCAAGCAAAT
hisC R	CGACCACTGTACGCAAGCTAGA
ilvC F	GGCATTCGCGAAGGAAAAT
ilvC R	TTATCAGCGGCTTCGCTAACA
purH F	TGCCTCGGATGCCTTTTTC
purH R	CAGGCTGAATAATCGCAGTGATT
rhaB F	TCGGCAGTGGTGGGAACT
rhaB R	TCCATCCCTATTAGCGACCAA
rpoD F	GGGGCTAATGAAAGCCGTTG
rpoD R	CGCTTGACGAATCCACCACG
hly F	TAA AAA CAA TGT ATT AGT ATA CCA CGG
hly R	GAT TCA CAA CTT GAA TGT CTG C
prfA F	ACG GGA AGC TTG GCT CTA TTT
prfA R	TGC CAT CAG GAG TTT CTT TAC CA
actA F	CAGCTAATAACGCAAACGGAAA
actA R	CCTGGTTCTTCCTTCGCTTTT
16S rRNA F	CCT GGT AGT CCA CGC CGT
16S rRNA R	TGC GTT AGC TGC AGC ACT AAG
bglA F	ATC TTC CAT ACA TTG GTG GAG
bglA R	AGT TTA GTT GCA AGT GCT GAT G
lmo2201 F	CTGCTCGCGCAATGAAAAT
lmo2201 R	TGTTCCGTGGGCATTAATGTAA
